# Supplementary material for: Quality Improvement Interventions for Early HIV Infant Diagnosis in Northeastern Uganda
Source: Hindawi journal article supplement (doi:10.1155/2016/5625364), 2016-01-01
Supplement: f1 [file 5625364.f1.pdf]

# Supplementary material S1: HIV exposed infants tested by first DNA-PCR

| Months    | Number of HEIs tested by DNA-PCR | Total number of HEIs eligible for DNA-PCR testing | Percentage of eligible HEIs tested by DNA-PCR |
|-----------|----------------------------------|---------------------------------------------------|-----------------------------------------------|
| June 2014 | 5                                | 25                                                | 20                                            |
| July 2014 | 9                                | 10                                                | 90                                            |
| Aug 2014  | 4                                | 5                                                 | 80                                            |
| Sep 2014  | 2                                | 3                                                 | 67                                            |
| Oct 2014  | 5                                | 5                                                 | 100                                           |
| Nov 2014  | 5                                | 5                                                 | 100                                           |
| Dec 2014  | 3                                | 3                                                 | 100                                           |
| Jan 2015  | 1                                | 1                                                 | 100                                           |
| Feb 2015  | 1                                | 1                                                 | 100                                           |
| Mar 2015  | 1                                | 1                                                 | 100                                           |
| Apr 2015  | 4                                | 4                                                 | 100                                           |
| May 2015  | 5                                | 5                                                 | 100                                           |
| June 2015 | 3                                | 4                                                 | 75                                            |
| July 2015 | 3                                | 3                                                 | 100                                           |
| Aug 2015  | 1                                | 1                                                 | 100                                           |
| Sept 2015 | 2                                | 2                                                 | 100                                           |
| Oct 2015  | 1                                | 1                                                 | 100                                           |
| Nov 2015  | 1                                | 1                                                 | 100                                           |
| Dec 2015  | 2                                | 2                                                 | 100                                           |
| Jan 2016  | 1                                | 1                                                 | 100                                           |
| Feb 2016  | 2                                | 2                                                 | 100                                           |
